# Supplementary material for: Anterior-Only Decompression Fails in Multisegmental Concentric Stenosis: Indicators for Secondary Posterior Surgery
Source: Research Square preprint supplement (doi:10.21203/rs.3.rs-6648160/v1), 2025-05-21
Supplement: Supplementary file 1 [file af0fa40ab4b8d91a242e70b0.xlsx]

## Sheet: Tabelle1
Patient. No	Alter	ASA	Geschlecht	Größe	Gewicht	BMI	OP-Diagnose	Paresen	JOA Score	Dauer der Beschwerden	Zugangsart	C2/7°	Art der Stenose	Instability (0 = no, 1 = yes)	K-Line negative (0 = no, 1 = yes)	Spine disease (0 = none)	Vorerkrankungen	Diabetes (0 = no, 1 = yes)	Osteoporose (0 = no, 1 = yes)	Raucher (0 = no, 1 = yes)	intraop Blutverlust	OP-Dauer (min)	C1/2	C2/3	C3/4	C4/5	C5/6	C6/7	N Segm.	intraoperative Komplikationen (0 = no, 1 = yes)	postoperative Komplikationen (0 = no, 1 = yes)	Length-of-stay (days)	postop MRT (0 = no, 1 = yes)	ventrales Shifting (mm)	dorsales Shifting (mm)	C2/7°	postoperative Instabilität (0 = no, 1 = yes)	3 Monatskontrolle (deutlich gebessert 4, leicht gebessert 3, idem 2, verschlechtert 1)	ventrales Shifting (mm)	dorsales Shifting (mm)	Paresen	JOA Score	12 Monatskontrolle (deutlich gebessert 4, leicht gebessert 3, idem 2, verschlechtert 1)	ventrales Shifting (mm)	dorsales Shifting (mm)	Paresen	JOA Score	dorsale Revision? (0 = no, 1 = yes)
1	69	2	weiblich	1.7	72	24.9135	Myelopathie		13	2 Monate	ventral	-11	hill-type	0	0	SKS LWS	aHT, Asthma	0	0	0		140				1			1	0	0	5	0			-23	0	3	2	0			nicht erschienen					0
2	60	2	männlich	1.78	96	30.2992	Myelopathie		14	2 Jahre	ventral	-10	hill-type	0	0	SKS LWS	aHT	0	0	0		120					1		1	0	0	4	0			-5	0	Persistenz SKS LWS										0
3	53	2	männlich	1.8	90	27.7778	Myelopathie		16	3 Monate	ventral	6	hill-type	0	0	0	Asthma	1	0	1	200	154				1			1	0	0	6	0			-1	0	4	3	1			4					0
4	57	2	männlich	1.7	67	23.1834	Myelopathie		13	1 Monat	ventral	-19	hill-type	0	0	SKS LWS	aHT	0	0	1		86					1		1	0	0	7	0			-9	0	4				15	Exazerbation SKS LWS					0
5	40	2	männlich	1.95	110	28.9283	Myelopathie			3 Monate	ventral	-10	hill-type	0	0	0	ADHS	0	0	0		150					1		1	0	0	4	0			-2	0	2	0.5	0			2					0
6	68	3	männlich	1.7	54	18.6851	Myelopathie		13.5	3 Monate	ventral	-3.4	konzentrisch	0	0	0	COPD, pAVK, Apoplex	0	0	1	60	112				1			1	0	0	7	0			-3	0	nicht erschienen					nicht erschienen					0
7	67	3	weiblich	1.6	75	29.2969	Myelopathie		15	1 Jahr	ventral	-1	konzentrisch	0	0	SKS LWS	DM, aHT, Glaukom	1	0	0	100	72					1		1	0	0	4				-7	0	Exazerbation SKS LWS				15	nicht erschienen					0
8	60	2	weiblich	1.68	62	21.9671	Myelopathie		14	wenige Tage	ventral	-10.4	konzentrisch	0	0	0	aHT	0	0	0		145						1	1	0	0	6	0			-5	0	nicht erschienen					4					0
9	82	2	männlich	1.88	88	24.8981	Myelopathie		14	1 Jahr	ventral	-5	konzentrisch	0	0	SKS LWS, PNP	Lymphom, Chemotherapie, TVT, LAE	0	1	0	100	96			1				1	0	0	4	0			-15	0	Exazerbation SKS LWS				15.5	3				16.5	0
10	56	1	männlich	1.7	80	27.6817	Myelopathie		14	1 Jahr	ventral	-12.3	konzentrisch	0	0	0	aHT	0	0	0		118					1		1	0	0	6	0			-12	0	3	1	0			nicht erschienen					0
11	75	2	männlich	1.76	82	26.4721	Myelopathie		13.5	1 Jahr	ventral	-21	konzentrisch	0	0	0		0	0	0		78					1		1	0	0	7	1	1	0	-31	0	4				15.5	4				15.5	0
12	63	2	weiblich	1.72	73	24.6755	Myelopathie		14.5	2 Jahre	ventral	-3	konzentrisch	0	0	0	Hirnschaden	0	0	0		156			1				1	0	0	6	0			-9	0	4				16	4	2	1		17	0
13	76	3	männlich	1.74	85	28.075	Myelopathie		15	9 Monate	ventral	-18	konzentrisch	1	0	0	KHK, aHT, Klappenvitien, Polio	0	1	0	200	146					1		1	0	0	6	1	1	2	6	0	nicht erschienen					nicht erschienen					0
14	72	2	männlich	1.88	98	27.7275	Myelopathie		12	1 Jahr	ventral	-15	konzentrisch	1	0	CTS	aHT	0	0	0		127			1				1	0	0	5	0			-8	0	nicht erschienen					2	2	0		12	0
15	79	3	männlich	1.76	86	27.7634	Myelopathie		13.5	1 Jahr	ventral	-7	konzentrisch	0	0	0		0	0	0		140					1		1	0	0	6	0			-10	0	3	0	0		14	nicht erschienen					0
16	78	3	männlich	1.79	129	40.2609	Myelopathie		15	halbes Jahr	ventral	9	konzentrisch	0	0	0	OSAS	0	0	0		113				1			1	0	0	6	0			-2	0	4				17	4	0	0			0
17	71	2	männlich	1.71	67	22.913	Myelopathie		16.5	2 Jahre	ventral	-8.5	konzentrisch	0	0	SKS LWS	pAVK, aHT	0	0	0	50	99				1			1	0	0	4	0			-29	0	3	1	0			3					0
18	63	3	männlich	1.75	59	19.2653	Myelopathie		14.5	3 Monate	ventral	-14	konzentrisch	0	0	SKS LWS	aHT, Klappenvitien, Kardiomyopathie	0	0	1		164			1				1	0	0	42	0			6	0	3				14.5	Exazerbation SKS LWS	1	0			0
19	67	2	männlich	1.81	73	22.2826	Myelopathie		14.5	1 Jahr	ventral	-22	konzentrisch	0	0	SKS LWS		0	0	0		72					1		1	0	0	4	0			-21	0	3	1	1		15.5	3	1	1		15.5	0
20	80	2	männlich	1.72	78	26.3656	Myelopathie		16	3 Monate	ventral	-13	konzentrisch	0	0	0	aHT	0	0	0		132				1			1	0	0	4	0			-15	0	4	1	1		17	4					0
21	78	3	weiblich	1.62	118	44.9627	Myelopathie		8.5	2 Jahre	ventral	-14	konzentrisch	1	0	SKS LWS	KHK, VHF, Kardiomyopathie	0	1	1	100	151					1		1	0	0	5	0			-17	0	4				12	nicht erschienen					0
22	65	3	weiblich	1.68	105	37.2024	Myelopathie		14	halbes Jahr	ventral	-9.4	konzentrisch	0	0	PNP, SKS LWS	Depression	0	0	1		81					1		1	0	0	5	0			-18	0	4	4	1		16.5	ausstehend					0
23	72	3	männlich	1.77	80	25.5354	Myelopathie		15	2 Jahre	ventral	-10	konzentrisch	1	0	Klippel-Feil, RA	KHK	1	0	0		123						1	1	0	0	4	0			-10.5	0	4	2	1		16.5	ausstehend					0
24	67	2	männlich	1.82	99	29.8877	Myelopathie		15.5	halbes Jahr	ventral	-22.5	ventral	0	0	0	aHT	0	0	1		90				1			1	0	0	6	0			-13	0	3	2	2			nicht erschienen					0
25	75	3	weiblich	1.6	69	26.9531	Myelopathie				ventral	-8.1	ventral	0	0	0	Leberzirrhose, DM, LAE, Mamma-CA	1	1	0	150	121					1		1	0	0	6	0			-27	0	4					4					0
26	52	2	weiblich	1.6	47	18.3594	Myelopathie		14.5	> 5 Jahre	ventral	3.3	ventral	0	0	0		0	0	1		134					1		1	0	0	4	0			5	0	3	3	0			3	1	2			0
27	47	2	männlich	1.7	79	27.3356	Myelopathie		16.5	1 Jahr	ventral	-18.7	ventral	0	0	0		0	0	1	200	156					1		1	0	0	5	0			-24.4	0	4				17	nicht erschienen					0
28	65	2	männlich	1.77	82	26.1738	Myelopathie		16.5	halbes Jahr	ventral	-20.6	ventral	1	0	0		0	0	0		137			1				1	0	0	5	0			-8	0	3	4	1			4				17	0
29	67	2	weiblich	1.68	67	23.7387	Myelopathie		15	2 Jahre	ventral	-8	ventral	0	0	0	Psoriasis, Hashimoto	0	0	0		101				1			1	0	0	5	0			-9	0	nicht erschienen					nicht erschienen					0
30	57	2	männlich	1.8	88	27.1605	Myelopathie		16	2 Jahre	ventral	-11	ventral	0	0	0	aHT	0	0	1		166				1			1	0	0	5	0			-9.7	0	nicht erschienen					3					0
31	61	2	männlich	1.81	110	33.5765	Myelopathie		13	halbes Jahr	ventral	-9	ventral	0	0	SKS LWS, Osteo	aHT, Depression	0	1	0	300	202					1		1	0	0	4	0			-9	0	3	1	0		15	3	1	0			0
32	69	3	männlich	1.7	73	25.2595	Myelopathie			1 Monat	ventral	-20	ventral	0	0	SKS LWS	KHK, Depression	0	0	1		111			1				1	0	0	18	1	2	0	-19	0	2					nicht erschienen					0
33	57	2	männlich	1.68	78	27.6361	Myelopathie		15	halbes Jahr	ventral	-8	ventral	0	0	0		0	0	0		116					1		1	0	0	5	0			-24	0	3				15.5	3	2	0			0
34	59	2	männlich	1.83	90	26.8745	Myelopathie		17	1 Jahr	ventral	3	ventral	0	0	0	aHT	0	0	1		138					1		1	0	0	5	0			-10	0						nicht erschienen					0
35	45	2	weiblich	1.68	76	26.9274	Myelopathie		16.5	2 Jahre	ventral	7	ventral	0	0	0	Mamma-CA	0	0	0		160					1		1	0	0	4	0			-2	0	nicht erschienen					Plexusneuritis	4	1			0
36	56	2	männlich	1.87	91	26.023	Myelopathie		15.5	3 Monate	ventral	-15	ventral	0	0	0		0	0	0		80					1		1	0	0	4	0			-25	0	4				17						0
37	72	2	männlich	1.74	92	30.3871	Myelopathie		13.5	9 Monate	ventral	5.6	ventral	0	0	SKS LWS		0	0	1		79					1		1	0	0	7	0			-5	0	4				15	nicht erschienen					0
38	50	2	männlich	1.8	88	27.1605	Myelopathie		15	4 Jahre	ventral	-13	ventral	0	0	0		0	0	0		152					1		1	0	0	6	0			-15	0	3				16	5	1	0		17	0
39	58	3	männlich	1.92	97	26.3129	Myelopathie		15	1 Jahr	ventral	6	ventral	0	0	0	aHT, OSAS, Herzinsuffizienz	0	0	0					1				1	0	0	6	0			-9	0	4	4	2			nicht erschienen					0
40	51	2	männlich	1.83	90	26.8745	Myelopathie		15.5	1 Jahr	ventral	-8	ventral	0	0	0		0	0	1		171			1				1	0	0	4	0			-8	0	4				17	4					0
41	59	3	weiblich	1.69	95	33.2621	Myelopathie		10	halbes Jahr	ventral	7	ventral	1	0	SKS LWS	Faktor V, Hashimoto, aHT, Sjögren-Syndrom	0	0	1	600	111			1				1	0	0	8	0			3.6	0	4	6	2		13	Exazerbation SKS LWS					0
42	59	3	weiblich	1.76	103	33.2515	Myelopathie		15.5	1 Jahr	ventral	-10	ventral	0	0	RA, Fibromyalgie	aHT	0	0	0	100	80				1			1	0	0	5	0			-11	0	4				16	4				17	0
43	39	2	männlich	1.73	95	31.7418	Myelopathie		16.5	3 Monate	ventral	9	ventral	0	0	0		0	0	1		145						1	1	0	0	6	0			5	0	4				17	4				17	0
44	81	3	männlich	1.73	72	24.0569	Myelopathie		14.5	2 Wochen	ventral	-22	ventral	1	0	0	Apoplex, aHT	1	1	0		96					1		1	0	0	6	0			-20	0	4				16	ausstehend					0
45	78	3	weiblich	1.67	79	28.3266	Myelopathie		14.5	2 Jahre	ventral	-22	ventral	0	0	SD LWS	Hashimoto	0	1	0		76					1		1	0	0	8	0			-16	0	3					nicht erschienen					0
46	51	2	männlich	1.8	74	22.8395	Myelopathie		16	halbes Jahr	ventral	-16.5	hill-type	0	0	0	aHT	0	0	0	250	219			1	1			2	0	0	7	1	1	0	-16.1	0	3	3	1		16	3				16.5	0
47	35	3	weiblich	1.58	99	39.6571	Myelopathie		15	wenige Tage	ventral	2	hill-type	0	0	0		0	0	1	200	222					1	1	2	0	0	10	0			-11	0	3	0	1		16	4					0
48	85	4	weiblich	1.63	80	30.1103	Myelopathie		11.5	2 Jahren	ventral	-29	hill-type	0	0	0	VHF, TAVI	0	1	1		235					1	1	2	0	0	21	0			-22	0	4				13	nicht erschienen					0
49	70	2	weiblich	1.6	59	23.0469	Myelopathie		14	4 Monate	ventral	-16.8	hill-type	0	0	0	aHT	0	0	0		138					1	1	2	0	0	6	1	3	1	2	0	4	5	1		16.5	4				17	0
50	65	3	männlich	1.7	73	25.2595	Myelopathie		13.5	1 Monat	ventral	-22	hill-type	0	0	0	aHT	0	0	0	100	126			1	1			2	0	0	8	0			-11	0	4				15.5	ausstehend					0
51	61	2	männlich	1.86	86	24.8584	Myelopathie		15	halbes Jahr	ventral	-18	hill-type	0	0	SKS LWS		0	0	1		112				1	1		2	0	0	6	0			-6	0	2	0	0			ausstehend					0
52	85	3	männlich	1.75	68	22.2041	Myelopathie		9	wenige Tage	ventral	-4.4	konzentrisch	0	0	Osteo	aHT	0	1	0	100	183					1	1	2	0	0	8	1	1	3	-20.6	0	4	1	1			Implantatlockerung					0
53	60	3	männlich	1.86	96	27.7489	Myelopathie		14	2 Jahre	ventral	-0.9	konzentrisch	0	0	0	DM, aHT, KHK	1	0	1	100	168				1	1		2	0	0	9	0			-16.2	0	nicht erschienen					nicht erschienen					0
54	70	2	weiblich	1.69	89	31.1614	Myelopathie		16	1,5 Jahre	ventral	-22.3	konzentrisch	0	0	Osteo		0	1	1		109					1	1	2	0	0	5	0			-12.6	0	3	1	0			4					0
55	64	3	männlich	1.95	129	33.925	Myelopathie		12	2 Jahre	ventral	-8.6	konzentrisch	0	0	0	VHF, DM, TVT	1	0	0	300	193				1	1		2	0	0	7	0			-20.2	0	4	2	1		17	unzutreffend					0
56	52	2	weiblich	1.65	67	24.6097	Myelopathie	Delta 4/5	12	wenige Tage	ventral	-12	konzentrisch	0	0	0		0	0	0	100	200				1	1		2	0	0	4	0			-18	0	nicht erschienen					3	2	0			0
57	74	3	weiblich	1.69	69	24.1588	Myelopathie	Bizeps 3/5	13	halbes Jahr	ventral	-3	konzentrisch	0	0	Osteo	aHT, OSAS, Schwannom	0	1	0		89				1	1		2	0	0	10	0			-2	0	3	2	0			3					0
58	74	2	weiblich	1.63	62	23.3355	Myelopathie		16	> 5 Jahre	ventral	-23	konzentrisch	0	0	0	aHT	0	0	0		111					1	1	2	0	0	4	1	1	0	-15	0	4	1	0		16.5	4					0
59	63	2	männlich	1.7	67	23.1834	Myelopathie	FH 3/5 links	10	1 Jahr	ventral	-17	konzentrisch	1	0	0	aHT	0	0	0	150	116				1	1		2	0	0	13	1	0	0	-21.2	0	3				13.5	nicht erschienen					0
60	59	2	männlich	1.8	80	24.6914	Myelopathie		12	1 Monat	ventral	2	konzentrisch	0	0	SKS LWS	KHK, aHT	0	0	1		179					1	1	2	0	0	4	0			-1	0	3				14	3					0
61	72	2	männlich	1.7	72	24.9135	Myelopathie		12	halbes Jahr	ventral	-3	konzentrisch	0	0	0		0	0	0	150	195				1	1		2	0	0	5	1	0	1	-20	0	3				13	3					0
62	60	2	weiblich	1.64	92	34.2058	Myelopathie		15	1 Jahr	ventral	-3	konzentrisch	0	0	0	aHT	1	0	0		227					1	1	2	0	0	10	0			-15	0	nicht erschienen					nicht erschienen					0
63	82	3	weiblich	1.58	45	18.026	Myelopathie		14	1 Jahr	ventral	-10	konzentrisch	0	0	0	Klappenvitien, aHT, Asthma, Sarkoidose	0	1	0		325				1	1		2	0	0	5	1	0	0	-11	0	2	0	0			2					0
64	65	3	weiblich	1.76	112	36.157	Myelopathie		14	1 Jahr	ventral	7	konzentrisch	0	0	SKS LWS	aHT, Hypothyreose	0	0	0		137				1	1		2	0	0	14	0			-6	0	4					nicht erschienen					0
65	58	2	weiblich	1.7	63	21.7993	Myelopathie		12	2 Jahre	ventral	-21	konzentrisch	0	0	0		0	0	0		156				1	1		2	Duraläsion	Restvorfall	23	0			-18	0	2	0	0		12	2				12	0
66	23	3	männlich	1.59	108	42.7198	Myelopathie		11.5	2 Monate	ventral	-18	ventral	1	0	0		0	0	1	250	161				1	1		2	0	0	4	0			-14.8	0	nicht erschienen					3	3	0			0
67	45	2	weiblich	1.64	64	23.7954	Myelopathie		15.5	1 Monat	ventral	6	ventral	0	0	0		0	0	0		129				1	1		2	0	0	5	0			-7.2	0	4	4	1		16.5	4	4	1		17	0
68	53	2	männlich	1.68	85	30.1162	Myelopathie		14	halbes Jahr	ventral	-2.5	ventral	0	0	0	Glaukom	0	0	1	150	173				1	1		2	0	0	5	0			-1.8	0	3				14.5	3					0
69	43	2	männlich	1.9	75	20.7756	Myelopathie			3 Monate	ventral	-13	ventral	0	0	SKS BWS		0	0	0	200	244				1	1		2	0	0	14	0			-18	0	4	6	1			4					0
70	54	2	weiblich	1.7	59	20.4152	Myelopathie		13	1 Jahr	ventral	2.4	ventral	0	0	0		0	0	0	200	238				1	1		2	0	0	5	1	0	0	-16	0	3					Schmerzexazerbation					0
71	38	2	weiblich	1.7	78	26.9896	Myelopathie		16	2 Jahre	ventral	-6.6	ventral	0	0	RA		0	0	0		129				1	1		2	0	0	5	0			-8.8	0	4				17	4				17	0
72	43	2	männlich	1.8	87	26.8519	Myelopathie		16.5	1 Monat	ventral	-5	ventral	0	0	0	aHT	0	0	0	100	116				1	1		2	0	0	4	0			-14	0	3	1.5	0			3				16.5	0
73	75	2	weiblich	1.68	84	29.7619	Myelopathie		14	1 Jahr	ventral	6	ventral	0	0	SKS LWS		0	0	0		123					1	1	2	0	0	5	1	0	0	5	0	4	1	2		15	Exazerbation SKS LWS					0
74	60	2	männlich	1.84	84	24.811	Myelopathie	Delta-/Bizeps 3/5	12.5	4 Monate	ventral	14	ventral	0	0	0		0	0	0	100	121				1	1		2	0	0	4	1	3	2	-19	0	3			leicht gebessert		3					0
75	60	3	weiblich	1.58	80	32.0461	Myelopathie		10.5	2 Jahre	ventral	4	ventral	0	1	0		1	0	1		240					1	1	2	0	0	8	0			-4	0	4				16.5	4					0
76	75	2	männlich	1.68	61	21.6128	Myelopathie		16.5	3 Monate	ventral	-8	ventral	0	0	0		0	0	0		134					1	1	2	0	0	8	1	4	1	-11	0	4				16.5	4					0
77	54	2	weiblich	1.62	65	24.7676	Myelopathie		16	1 Jahr	ventral	4.5	ventral	1	0	0	Hashimoto, aHT, Asthma	0	0	1		143					1	1	2	0	0	7	0			-6	0	2	0	0		16	2				16	0
78	71	2	männlich	1.89	86	24.0755	Myelopathie	Tetraspastik	11	8 Wochen	ventral	-14	hill-type	0	0	Osteo	aHT	0	1	0	400	157			1	1	1		3	0	0	5	0			-23	0	4				14.5	nicht erschienen					0
79	52	3	männlich	1.91	112	30.7009	Myelopathie		10.5	2 Jahre	ventral	-10	hill-type	0	1	0	aHT	1	0		200	324				1	1	1	3	0	Recurrensparese	9	0			-5	0	2										0
80	60	2	weiblich	1.63	70	26.3465	Myelopathie		14.5	2 Jahre	ventral	8	konzentrisch	0	0	OPLL	aHT	1	0	1		207				1	1	1	3	0	0	8	0			-2	0	4	0	2		15.5	4					0
81	59	2	weiblich	1.64	65	24.1672	Myelopathie		16	1 Jahr	ventral	-11	konzentrisch	0	0	0	aplastische Anämie	0	0	0		189				1	1	1	3	0	0	5	0			-20	0	3	1	0		16	4				16	0
82	70	3	weiblich	1.68	112	39.6825	Myelopathie		13.5	1 Jahr	ventral	3	ventral	0	0	0	Tremor, Fibromyalgie	0	0	0		318				1	1	1	3	0	0	5	0			-9.8	0	4	1.5	0		15	4				16	0
83	70	2	männlich	1.74	83	27.4145	Myelopathie		16	halbes Jahr	ventral	-15	ventral	0	0	0	KHK, Stents	0	0	0	100	137				1	1	1	3	0	0	5	0			-27	0	3	2	0			nicht erschienen					0
84	75	3	männlich	1.8	100	30.8642	Myelopathie			2 Jahre	ventral	-21	ventral	0	0	0	KHK, ACVB, aHT, Klappenvitien	1	1	1		307				1	1	1	3	0	Wundinfektion	11	1	0.5	0	-21	0	4					4					0
85	70	2	weiblich	1.58	49	19.6283	Myelopathie		14.5	halbes Jahr	ventral	3	ventral	0	0	0	M Basedow	0	0	0		136				1	1	1	3	0	0	4	0			-20	0	4	1	0			4					0
86	73	2	weiblich	1.65	68	24.977	Myelopathie		12	1 Jahr	ventral	7	konzentrisch	0	0	Osteo	aHT, Mamma-CA	0	1	1		141				1			1	0	0	5	0			4.4	0	2	0	0			unzutreffend					1
87	76	3	männlich	1.76	108	34.8657	Myelopathie		12	halbes Jahr	ventral	-23	konzentrisch	0	0	0		0	1	0		173					1	1	2	0	0	4	1	1	0	-25	0	2	1	0		12	unzutreffend					1
88	69	2	weiblich	1.72	115	38.8724	Myelopathie	Hüftbeuger 3/5	11	3 Monate	ventral	-15	konzentrisch	0	0	PNP	aHT	1	0	1		223				1	1	1	3	0	0	25	1	0	0	-3	0	unzutreffend					unzutreffend					1
89	47	1	weiblich	1.68	70	24.8016	Myelopathie		16	1 Jahr	ventral	2	konzentrisch	0	0	Klippel-Feil		0	0	0		274				1	1	1	3	0	leichtgradige Parese	5	1	0	0.5	-9	0	unzutreffend					unzutreffend					1
90	54	2	weiblich	1.69	72	25.2092	Myelopathie		11.5	1 Monat	ventral	-29	konzentrisch	0	0	0	Faktor V	0	0	0		130				1	1		2	0	0	3	0			-30	0	2	0	0		11.5	unzutreffend					1
91	76	2	männlich	1.78	72	22.7244	Myelopathie		6.5	3 Monate	ventral	-25	konzentrisch	0	0	0	aHT, Depression	1	1	0	100	125				1	1		2	0	0	13	1	0.5	0.5	-40	0	unzutreffend				11.5	unzutreffend					1
92	49	2	männlich	1.86	100	28.9051	Myelopathie		14	1 Jahr	ventral	-12	konzentrisch	0	0	0	aHT	0	0	0		186				1	1		2	0	0	5	0			-21	0	3	0	0		15	unzutreffend					1
93	77	2	männlich	1.78	65	20.5151	Myelopathie		13	3 Jahre	ventral	-12	konzentrisch	0	0	0		0	0	0		79					1		1	0	0	3	0			-28	0	2	0	0		13	2				13	1
94	78	3	weiblich	1.6	55	21.4844	Myelopathie		16	2 Jahre	ventral	2	konzentrisch	1	0	0	Depression	0	1	1	150	108				1	1		2	0	0	6	0			-6	0	1 (nach Sturz) bei Lockerung Schrauben	0	1			unzutreffend					1
